# Supplementary material for: Barley has two peroxisomal ABC transporters with multiple functions in β-oxidation
Source: PubMed Central journal article supplement (PMC4144768; doi:10.1093/jxb/eru243), 2014-06-09
Supplement: supp_eru243_jexbot123471_file001.pdf [file supp_eru243_jexbot123471_file001.pdf]

**Figure S1. Alignment of *HvABCD1* and *HvABCD2* cDNA sequences, showing the region used for the RNA interference construct**

The alignment was created using ClustalW2 multiple sequence alignment.

|             |                                                               |     |
|-------------|---------------------------------------------------------------|-----|
| HvABCD2     | ATGTCAGGTACCATGCCGTCCCTGCAGCTGCTGCAGCTACCGAGCGTGGCCGCGGGCTG   | 60  |
| RNAi-insert | -----                                                         |     |
| HvABCD1     | -----ATGTCATCTCTTCAGTTATTGCAACTAACAGAGCATGGGCGGAACCTT         | 48  |
| HvABCD2     | CTCGCGTCCCGAGGAGGACGCTGGCGGTTGTCTCGGGCGCGCTGGTCGCTGGCGGGGCG   | 120 |
| RNAi-insert | -----                                                         |     |
| HvABCD1     | TTTTCTTCGAGAAGGAGGACGCTTGCAGTTGTTTCTGGTGCAGTCTGCTTGGTGGAACT   | 108 |
| HvABCD2     | TTGGCGTACGCGCGGTTCGGGCCGAGGCCAAAGGAGGCGAGGCCGTCGGGAGGCCCGCC   | 180 |
| RNAi-insert | -----                                                         |     |
| HvABCD1     | TTAGCATACGCGCAGACAAGTCGACG-----GAGGAAACATCGGGAAGAAAATCCT      | 159 |
| HvABCD2     | GCCAATGATGGCGGCGATGCGTTGGGCAGGAATGGGAGAGGCTGGGTCACAGCGGCACG   | 240 |
| RNAi-insert | -----                                                         |     |
| HvABCD1     | TGTAATGATG-CAAATGTACATAG--CAGGAGTGAAGAGAACATTAGTCAAACCGGTGTC  | 216 |
| HvABCD2     | GATGGCCGGTTGGCCGGGACGACGAAGCGGAGGAAGAGCGCGCTGAAGTCCTTGCAATTC  | 300 |
| RNAi-insert | -----                                                         |     |
| HvABCD1     | GATGGTAAAGTG--GTAAAAACAAGGAAAAAGAAAAATTTATTGAAATCCTTACATTTT   | 273 |
| HvABCD2     | TTGGCCGCTATCCTGCTCAAGAAGATTGGACCGAGTGGCACGCGATACCTTCTTGGCTTG  | 360 |
| RNAi-insert | -----                                                         |     |
| HvABCD1     | CTGGCTGCTATTTTACTTAAGAAGATTGGTCCAAGCGGAACAATTACCTTCTTGGCTTG   | 333 |
| HvABCD2     | ATGTTGACAGCCGTGCTGCGTACTGCTGTCGGGCATAGATTAGCAAAGTTCAAGGCTTT   | 420 |
| RNAi-insert | -----                                                         |     |
| HvABCD1     | ATGTTAACAGCAGTGTACGTACAACCATTTGGTCACAGATTAGCAAAGTTCAAGGGTAT   | 393 |
| HvABCD2     | CTATTTAAAGCGGCATTTCTTCGCGGTGTTCCAACCTTTACGCGCCTAATTATAGAGAAT  | 480 |
| RNAi-insert | -----                                                         |     |
| HvABCD1     | TTGTTTAAATCCGCGTTTCTTCGCGGTGTTCCGACTTTACACGCGCTAATCATTGAAAAAT | 453 |
| HvABCD2     | CTGATCTTATGCTTTCTCCAATCAGCAGTATACCAGACCTCAAATACTTAACTGGGTCC   | 540 |
| RNAi-insert | -----                                                         |     |
| HvABCD1     | CTTCTATTATGCTTTCTTCAGTCCACGGTATATCAGACCTCAAAGTACTTGACAGGATCC  | 513 |
| HvABCD2     | TTGAACTTGCCTTCAAGAAAAATTTTAAACAGACCTCGTCCATGCCGATTATTTCCAGAAT | 600 |
| RNAi-insert | -----                                                         |     |
| HvABCD1     | TTAAGCTTGCCTTCAAGAAAAATTTGACGGATCTCATCCATGCTGATTACTTCGAGAAT   | 573 |
| HvABCD2     | ATGGTTTACTACAAGATCTCTCATGTGGATCATCGAATATCAAATCCGGAGCAAAGGATT  | 660 |
| RNAi-insert | -----                                                         |     |
| HvABCD1     | ATGGTTTACTACAAGATCTCACATGTAGATCATCGGATTTCAAACCCAGAGCAAAGGATT  | 633 |
| HvABCD2     | GCCAGTGATATCCAAAGTTCTCTTCTGAACTTAGTGAACCTGTACAGGATGATTTGGCT   | 720 |
| RNAi-insert | -----                                                         |     |
| HvABCD1     | GCTAGTGATATTCCTAAGTTCTGCGCAGGACTAAGTGACCTTGTACAAGATGATCTGATT  | 693 |
| HvABCD2     | GCAGTTGCAGAAGGTTGATATATACATGGCGTCTCTGTTCTTATGCTAGTCCGAAATAC   | 780 |
| RNAi-insert | -----                                                         |     |
| HvABCD1     | GCAGTTGCAGATGGGTTAATATACATCTGGCGCATCTGCTCTTATGCAAGTCCGAAATAT  | 753 |
| HvABCD2     | ATGCTTTGGATTCTGGCATATATACTAGTTGCTGGTGGAGCAATTAGAAAATTTCTCTCCT | 840 |
| RNAi-insert | -----                                                         |     |
| HvABCD1     | GTTCTCTGGATTCTGGCATATGTAAGTTGGTGGTGGCACAATTAGAAAATTTCTCTCCT   | 813 |
| HvABCD2     | GCTTTTGGGAAGATGAAATCCACAGAGCAGCACTTAGAAGGGGAGTATCGTCAACTTCAT  | 900 |
| RNAi-insert | -----                                                         |     |
| HvABCD1     | TCTTTTGGGAAGTTGAAAGCCATGGAACAACAACCTAGAAGGGGAATATCGCCAGGTTTCT | 873 |
| HvABCD2     | TCACGCTTAAGAACTCATGCTGAGAGTGTAGCATTTTATGGTGGTGAAGAGAGAAGAA    | 960 |
| RNAi-insert | -----                                                         |     |
| HvABCD1     | TCACGACTGAGAACTCATGCTGAGAGCGTGGCATTATGGTGGTGAAGAGAGAAGAA      | 933 |

|             |                                                               |      |
|-------------|---------------------------------------------------------------|------|
| HvABCD2     | TATCATATTATGCAGCGATTTTCGAGCTCTTGTGGGCACTTGAAGCATGTACTCCATGAA  | 1020 |
| RNAi-insert | -----                                                         |      |
| HvABCD1     | TCACACATTATGCAGCGGTTCCAGGCTCTTGTGCGGCACTTGAATGTTGTTCTTCATGAG  | 993  |
| HvABCD2     | AACTGGTGGTTCCGCATGATTCAAGATTTCTTTCTGAAGTACTTTGGGGCCACTGTAGCA  | 1080 |
| RNAi-insert | -----                                                         |      |
| HvABCD1     | AACTGGTGGTTTGGCATGATTCAAGATTTCTTTCTGAAGTATCTTGGTGCCACAGTGGGA  | 1053 |
| HvABCD2     | GTGTGCTTATTATCGAACCGTCTTCTCCGGTGACCTTAGACCTGATTCATCTACCATA    | 1140 |
| RNAi-insert | -----                                                         |      |
| HvABCD1     | GTTATCTTGATTGTGCAACCTTTCTTTGCGGGAGATCTTAAACCTGATAACATCTACTTTA | 1113 |
| HvABCD2     | GGAAGGGCTGATATGTTGAGTAACCTTCGATACCACACTAGCGTGATCATAGCACTATTT  | 1200 |
| RNAi-insert | -----                                                         |      |
| HvABCD1     | GGGCGGGCAGAGATGTTGAGCAATCTTAGATATCACACAAGCGTGATAATATCATTATTC  | 1173 |
| HvABCD2     | CAGTCTCTTGGGACCCCTCTCTATCAGCTCTAGGCGTTTGAATATCCTGAGTGGCTATGCA | 1260 |
| RNAi-insert | -----                                                         |      |
| HvABCD1     | CAGTCGCTTGGCACCCCTTCTACCAGCTCAAGACGTTTAAATCTTCTCAGTGGCTATGCA  | 1233 |
| HvABCD2     | GACCGGATTCGTGAGTTACTAGATGTTTACGTGAGCTGTCTGGGGTCCGTGATAGATCG   | 1320 |
| RNAi-insert | -----                                                         |      |
| HvABCD1     | GACCGTATTCACGAGTTACTGGATGTTTACGTGAGCTATCTGGGGTTCGCGACAGGTCG   | 1293 |
| HvABCD2     | TTGAATCACAGCTCTTCTGTGGGAATTACATCAGCGAAGCAAACCATATAGAATTTTCT   | 1380 |
| RNAi-insert | -----                                                         |      |
| HvABCD1     | ATGAGTCGAAATTCCTCTGCCAAAACCTATATTAGTGAGGCAAACCTATATAGAATTTTCA | 1353 |
| HvABCD2     | GGTGTAAAGTGGTGACACCCGCTGGGAACGTTTGGTTGACGATTTAACTCTCCGAGTA    | 1440 |
| RNAi-insert | -----                                                         |      |
| HvABCD1     | GGTGTCAAGTGGTGACACCCCTCTGGGAATGTCTTGGTTGATGATTTAACTCTCCGGGTG  | 1413 |
| HvABCD2     | GAAACTGGATCTAATCTTTAATCACCCGTCCCAATGGTAGTGAAAAAGCTCCCTTTT     | 1500 |
| RNAi-insert | -----                                                         |      |
| HvABCD1     | GAGTCGGGTTCTAATCTTTTGATCACTGGTCCCAACGGTAGTGAAAAAGCTCTCTTTTC   | 1473 |
| HvABCD2     | CGGGTCTTGGAGGCCATATGGCCGCTAGTATCTGGCCATATTGTCAAACCTGGTGTGGT   | 1560 |
| RNAi-insert | -----                                                         |      |
| HvABCD1     | CGTGTCTTGGGGTCTGTGGCCACTTGTATCTGGCCACATTGTCAAACCTGGTGTGGT     | 1533 |
| HvABCD2     | TCCGATCTTAAACAAGGAAATCTTTTATGTCCCAAAAGACCATACACAGCTGTTGGCACA  | 1620 |
| RNAi-insert | -----                                                         |      |
| HvABCD1     | TCTAATCTTAAACAAGGAAATTTTATGTCCCAAGGACCATATACAGCTGTTGGAACA     | 1593 |
| HvABCD2     | CTTCGCGAACAACTAATCTATCCTCTTACAGCAGATCAGGAGACTGAACCCTTACCTAT   | 1680 |
| RNAi-insert | -----                                                         |      |
| HvABCD1     | CTGCGCAGACCAGTTAATCTATCCACTTACAGCAGATCAGGAAACCGAACCTTAGCTAT   | 1653 |
| HvABCD2     | GATGGCATGGTGGACCTTCTAAAGAATGTTGATCTGGAATACTTGCTAGAACGTTATCCT  | 1740 |
| RNAi-insert | -----                                                         |      |
| HvABCD1     | GGTGGTATGGTGGATCTTCTAAAGAATGTTGATTTAGAATACTTGCTAGAACGCTACCCT  | 1713 |
| HvABCD2     | CTTGACAAGGAAGTTAACTGGGGTGATGAGCTATCCCTTGGCGAGCAACAAAGATTAGGA  | 1800 |
| RNAi-insert | -----                                                         |      |
| HvABCD1     | GTCGACAAGGAAGTTAACTGGGGCGATGAGTTGTCTCTTGGTGAGCAACAGAGATTGGGA  | 1773 |
| HvABCD2     | ATGGCCAGGCTGTTCTACCATAAGCCAAAATTTGCTATCTTGTGATGAGTGTACCAGTGCT | 1860 |
| RNAi-insert | -----                                                         |      |
| HvABCD1     | ATGGCCAGATTGTTCTACCATAAGCCCAAGTTTGGCCATCCTGGATGAGTGTACTAGTGCT | 1833 |
| HvABCD2     | GTGACAATTGATATGGAAGAACGTTTCTGCAAAAAGGTTCCGAGCATGGGAACATCATGC  | 1920 |
| RNAi-insert | -----                                                         |      |
| HvABCD1     | GTGACGACTGATATGGAAGAACGTTTCTGCAATAGGGTCCGAGCAATGGGCACGTCATGC  | 1893 |
| HvABCD2     | ATAACAATATCTCATCGCCAGCATTAGTTGCATTTTCATAATATTGTTTTGTCAATTGGAC | 1980 |
| RNAi-insert | -----                                                         |      |
| HvABCD1     | ATAACAATATCTCACCGACCAGCATTAGTTGCTTTTCATGATGTCGTTTTGTCTTGGAT   | 1953 |





A

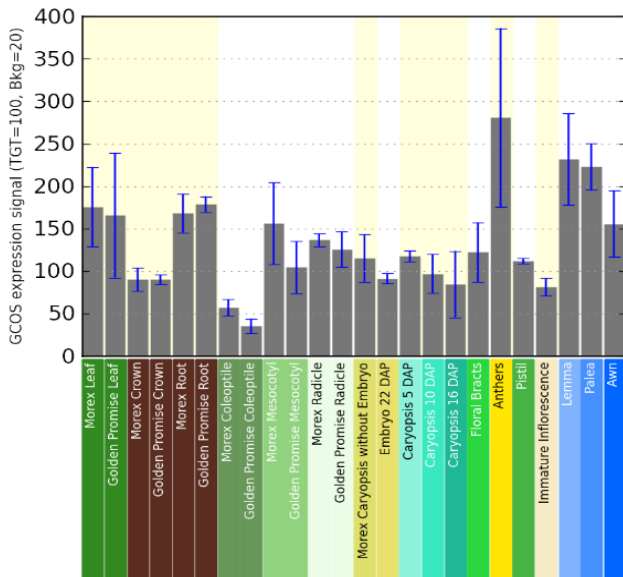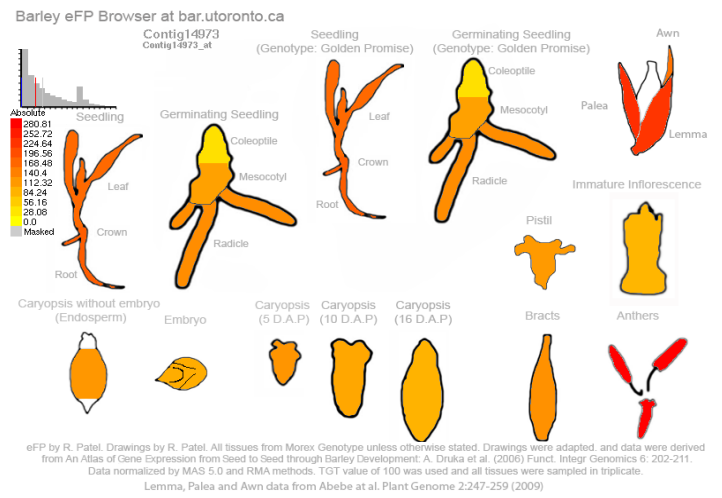

B

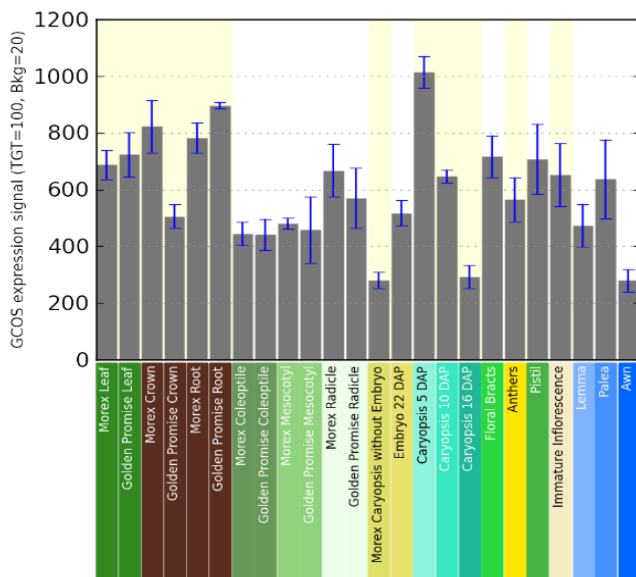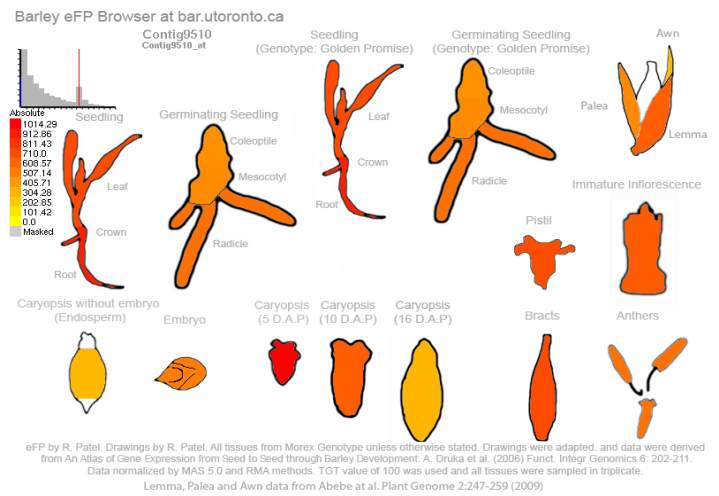

**Figure S2. Expression analysis of *HvABCD1* and *2***

Histograms and and electronic fluorescent pictographs for (A) *HvABCD1* and (B) *HvABCD2* were obtained by interrogating the Bio-Array Resource barley eFP browser.

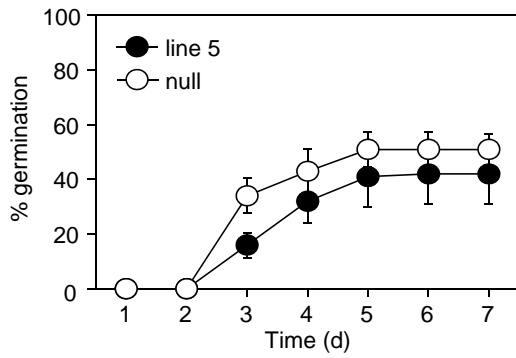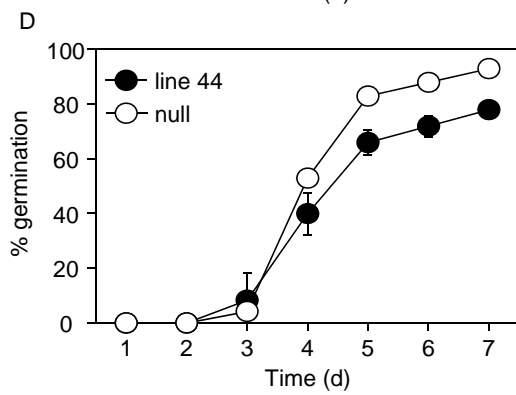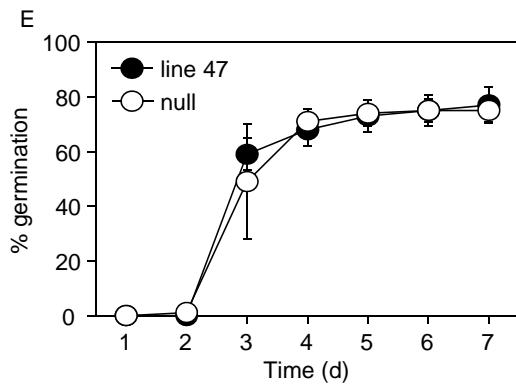

**Figure S3. Germination of RNAi lines and corresponding nulls over 7 d.**

Values are means  $\pm$  SE (n=3; 50 seeds per replicate).

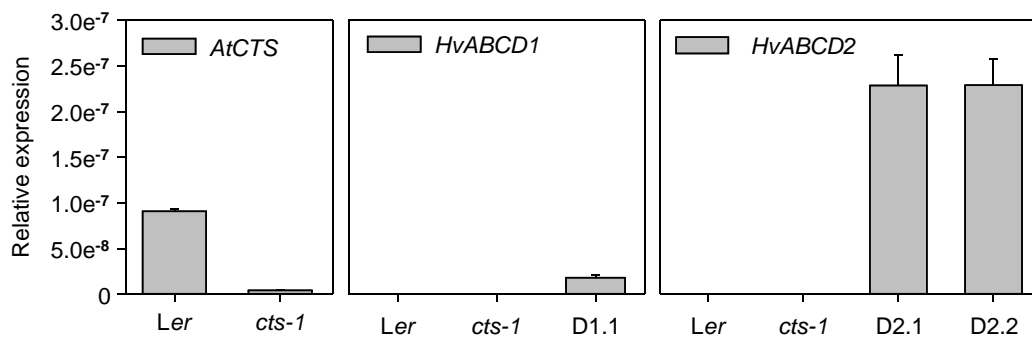

**Figure. S4. Q-PCR analysis of gene expression in Arabidopsis transgenic lines and controls.**

Transcript abundance is shown relative to housekeeping genes. RNA was isolated from seedlings grown on 0.5 x MS containing 0.5 % sucrose. The testae of *cts-1* and line A19 seeds were mechanically disrupted to induce germination. Values are means  $\pm$  SE (n=3)

## Supplementary Data

**Supplementary Table 1 Primers used in this study**

| Name                | Sequence (5'-3')                                              |
|---------------------|---------------------------------------------------------------|
| CTS-a start F       | CAATGTCATCTCTTCAGTTATTGC                                      |
| Hv14973 R2          | GGTGCTTCCTCTGTTTGTTG                                          |
| HvABCD1 (CTSa) F    | AGTGTGCCATCTGAACAAAC                                          |
| HvABCD1 (CTSa) R    | AATGGAACTTTTGCCACTGC                                          |
| HvABCD2 (CTSb) F    | CAGCCTCTCCCCATTCT                                             |
| HvABCD2 (CTSb) R    | AGTGCAGCCTCAGACGAAAT                                          |
| $\alpha$ -tub F     | AGTGCCTGTCCACCCACTC                                           |
| $\alpha$ -tub R     | AGCATGAAGTGGATCCTTGG                                          |
| PM19F               | GGAGGCGTTCGTCATCATC                                           |
| PM19R               | TCCTATTTAGACCCTTGCCAC                                         |
| HvABCD RNAi F       | TTCCTGAGAGCTATATCCCCTGA                                       |
| HvABCD RNAi R       | GGCACTGGGGTATCCTTTTGAG                                        |
| HvELF1F             | CCTGCCCAAGTTCCTCAA                                            |
| HvELF1R             | GGCTTGGTGGGAATCATCT                                           |
| HvTubulinF          | ACACCATTGGCAAGGAGATT                                          |
| HvTubulinR          | TGTCGGACAGCTTCCTGATAC                                         |
| HvJIP2 F            | ACCTTCATGACGGCAACTG                                           |
| HvJIP2 R            | CTCCCGGTGTTCTTTTCATC                                          |
| HvJRG1.2 F          | GAAATGGAGGGGGTGATAAAG                                         |
| HvJRG1.2 R          | CGCTGCTAACAGTGATGCTC                                          |
| AtCTS F             | GAGATTAGGCATGGCACGTT                                          |
| AtCTS R             | GTCGCATTTGTGCATTCATC                                          |
| AtCTL1 F            | AGTGGAGAGGCTGCAGAAGA                                          |
| AtCTL1 R            | CTCGGGTAGCACGAGCTTTA                                          |
| AtCTL3 F            | GAAGTGTCTCGACAAAGGTCGT                                        |
| AtCTL3 R            | CCTTTTGGCACTTCTGGTG                                           |
| AtCTSp5'Nco         | TAACCATGGACTTGGAAGAAGGCGGTGA                                  |
| AtCTSp3'Kpn         | TAAGGTACCTGACATGGCCTGGAATTGAGTATA                             |
| HvCTSa Kpn5'        | TTAGGTACCATGTCATCTCTTCAGTTATTGCAA                             |
| HvCTSa Not3'        | TTTGCGGCCGCTGGTGCTTCTCTGTTTGTTG                               |
| CTSb Kpn5'          | TTAGGTACCATGCCGTCCCTGCAGCTG                                   |
| CTSb Not I-Bgl II R | TTAGCGGCCGCATCACTGGCAATCCTTTGCTC                              |
| CTSb Bgl IIF        | ACTGCTGTCCGGCATAGATT                                          |
| CTSb Not3'          | ATTGCGGCCGCCGACCCGGTATGAACAACCTT                              |
| FT206               | CCCAATGGTACCAAATGTCATCTCTTCAG                                 |
| FT207               | CGAAGGCTGCAGTCAAGCGTAATCTGGAACATCGTATGGGTAGTGTTG<br>ATTGAACAC |
| FT208               | CCCAATGGATCCAAAATGCCGTCCCTGCAGC                               |
| FT209               | CGAAGGGTCGACTCAAGCGTAATCTGGAACATCGTATGGGTAATGTTGG             |



|              |
|--------------|
| ATCTCGCATAGC |
|--------------|

Barley accession numbers and Arabidopsis gene identifiers: HvJIP2, CAA47017; HvJIP37, CAA58110; HvJRG1.2, AAB72097; AtCTS, AT4G39850; AtCTL1, At1g04850; AtCTL3, At5g18800.
